## Article title

**SEN1 is responsible for molybdate transport into nodule symbiosomes for nitrogen fixation in *Lotus japonicus***

**Running title:** SEN1 transports molybdate for N fixation

## Author names and affiliations

Qingnan Chu<sup>1</sup>, Tsuneo Hakoyama<sup>2</sup>, Makoto Hayashi<sup>2</sup>, Kiminori Toyooka<sup>2</sup>, Mayuko Sato<sup>2</sup>, Takehiro Kamiya<sup>1</sup>, Toru Fujiwara<sup>1\*</sup>

<sup>1</sup> Graduate School of Agricultural and Life Sciences, The University of Tokyo, Yayoi, Bunkyo-ku, Tokyo 113-8657, Japan.

<sup>2</sup> Center for Sustainable Resource Science, RIKEN, Yokohama, Kanagawa 230-0045, Japan

## Author for Contact details

Name: **Toru Fujiwara**

Complete Address: Department of Applied Biological Chemistry, Graduate 14 School of Agricultural and Life Sciences, The University of Tokyo, Tokyo, 113-15 8657 Japan

Phone number: +81-3-5841-5104

Email: [atorufu@mail.ecc.u-tokyo.ac.jp](mailto:atorufu@mail.ecc.u-tokyo.ac.jp)

## One-sentence summary

SEN1 is localized partly in the peribacteroid membrane of nodule cells and mediates the molybdate exportation from the host plant cytosol to the symbiosomes for symbiotic nitrogen fixation.

## Funding information

This research was supported in part by the Grant-in-Aid for Scientific Research to T.F. (Nos. 20F20098, 18H05490 and 19H05637).

## Abstract

Symbiotic nitrogen fixation (SNF) in legume root nodules requires a steady supply of molybdenum (Mo) for synthesis of the iron-Mo cofactor for nitrogenase in bacteroids. For this nutrient to be exported by the host plant it must cross the peribacteroid membrane (PBM), however, the molybdate transporter responsible has not yet been identified. A *Lotus japonicus* symbiotic mutant, *sen1*, forms nodules that do not fix nitrogen; it has nodule defects and bacteroid degradation. The biochemical function and subcellular localization of SEN1 protein remains to be elucidated. Here, we found a new phenotype in which the *SEN1* mutation resulted in increased Mo accumulation in the nodule host fractions but decreased Mo accumulation in the bacteroids at 10 days post inoculation. We identified the molybdate efflux transport activity of SEN1 via heterologous expression in yeast. *SEN1* was expressed exclusively in nodules, and its expression was stable in response to varying Mo supply in nutrient solution. *In situ* immunostaining verified that the SEN1 protein is localized, in part, to the PBM in the rhizobium-infected cells. Taken together, these results confirmed that SEN1 is responsible for mediating molybdate efflux from the cytosol of nodule host cells to the symbiosomes for SNF. Furthermore, *SEN1* mutation reduced the expression of *nifD* and *nifK*, suggesting that *SEN1* may be pertinent to iron-Mo-cofactor assembly. This work fills the knowledge gap regarding how molybdate is allocated from the host plant to the bacteroids; such knowledge is critical for developing new SNF biological systems in non-legume plants.

## 1 Introduction

2 Symbiotic nitrogen fixation (SNF) performed in differentiated root organs (nodules) by the  
3 legume–rhizobia partnership is one of the main alternatives to the overuse of synthetic N fertilizers  
4 ([Henneron et al., 2020](#); [Herridge et al., 2022](#)). Within nodules, endosymbiotic rhizobia  
5 differentiate into bacteroids surrounded by a peribacteroid membrane (PBM) ([Day et al., 1989](#)),  
6 forming the organelle-like structures—symbiosomes—where SNF takes place. The enzyme that  
7 catalyzes SNF is a metalloprotein called a nitrogenase—the only one in the biosphere that converts  
8 N<sub>2</sub> into ammonium ([Milton, 2022](#)). In exchange for this ammonium, the host plant provides  
9 photosynthates and mineral nutrients for the bacteroids. Nutrient exchange between the host plant  
10 and the bacteroids across the PBM is essential for SNF ([White et al., 2007](#); [Udvardi and Poole,](#)  
11 [2013](#)).

12 Molybdenum (Mo) is one of the most crucial nutrients transferred to the bacteroids, because  
13 it is required for assembly of the iron (Fe)-Mo cofactor (FeMoco) of nitrogenase ([González-](#)  
14 [Guerrero et al., 2014](#); [Ohki et al., 2022](#)). Additionally, Mo is essential for plants as a part of the  
15 Mo cofactor in five enzymes involved in nitrate assimilation, phytohormone biosynthesis, purine  
16 metabolism, and sulfite detoxification ([Hille et al., 2011](#)). Mo, unlike other transition metals, is  
17 taken up from the soil as the oxyanion molybdate (MoO<sub>4</sub><sup>2-</sup>) instead of in a cationic form. To satisfy  
18 the symbiotic requirement and supply the bacteroids, these MoO<sub>4</sub><sup>2-</sup> must first be translocated to  
19 the rhizobia-infected cells of the nodules and then transverse the PBM and the space between the  
20 PBM and the bacteroid membrane ([Tejada-Jiménez et al., 2017](#); [Gil-Díez et al., 2019](#)). The  
21 *ModABC* operon is responsible for molybdate uptake from the peribacteroid space, which is  
22 followed by Mo incorporation into the bacteroids ([Hernandez et al., 2009](#)). The only known plant-  
23 type-specific molybdate transporters belong to the Molybdate Transporter type (MOT) family; the  
24 first one was identified in the higher plant *Arabidopsis thaliana* ([Tomatsu et al., 2007](#)). In legume  
25 plants, *LjMOT1* has been identified to play a role in molybdate uptake from the soil and  
26 translocation to the shoots of *Lotus japonicus* ([Gao et al., 2016](#); [Duan et al., 2017](#)). *MtMOT1.2* has  
27 been identified in *Medicago truncatula* to mediate molybdate delivery via the vasculature into the  
28 nodules ([Gil-Díez et al., 2019](#)), and *MtMOT1.3* further introduces molybdate into rhizobia-infected  
29 or uninfected cells within the nodules ([Tejada-Jiménez et al., 2017](#)). However, the transporters  
30 mediating Mo loading from nodule host cells to the symbiosomes for SNF remain unknown.

31 The mutant *sen1* (*stationary endosymbiont nodule 1*) forms ineffective nodules (Fix<sup>-</sup>  
32 phenotype), blocks N fixation, and impairs the bacteroid differentiation in *L. japonicus* (Suganuma  
33 et al., 2003; Hakoyama et al., 2012). Expression of *SENI* has been detected exclusively in the  
34 nodules, and Southern blot analyses have revealed that the *SENI* clade appears to be specific to  
35 legumes (Hakoyama et al., 2012). *SENI* encodes an integral membrane protein homologous to  
36 CCC1 (Ca<sup>2+</sup>-sensitive cross-complementer 1), which is a vacuolar Fe/manganese transporter in  
37 *Saccharomyces cerevisiae*, and VIT (vacuolar iron transporter) in *A. thaliana* (Liu et al., 2020).  
38 The orthologous gene in soybean, *GmVTL1a* (*Glycine max vacuolar iron transporter-like*), is  
39 responsible for Fe transport across the PBM to bacteroids (Brear et al., 2020; Liu et al., 2020).  
40 However, the yeast complementation assays have demonstrated that *SENI* cannot complement the  
41 *Δccc1* mutant in yeast (Brear et al., 2020), suggesting that it may not be responsible for Fe transport.  
42 Although *SENI* protein is essential to the N fixation capacity of legume nodules, the physiological  
43 role and subcellular localization of this protein remains to be elucidated.

44 Here, on the basis of the results of a phenotypic analysis and the heterologous expression of  
45 *SENI* in *S. cerevisiae*, we demonstrated that *SENI* is a molybdate efflux transporter. Also, we  
46 demonstrated that *SENI* protein is localized, in part, to the PBM, thus allowing it to mediate the  
47 molybdate transport from the host plant cytosol to the symbiosome by crossing the PBM. This is  
48 the first molybdate efflux transporter known so far, and our findings answer the question of how  
49 molybdate is transported from the host cell cytosol to the bacteroids in the nodules.

## 50 Results

### 51 *sen1* mutants show defects in nodule development and plant growth under N deficiency

52 *sen1-1* and *sen1-2* mutants were produced from ethylmethane sulfonate mutagenesis of *L.*  
53 *japonicus* ecotype Gifu B-129. Both harbored single nucleotide mutations (*sen1-1*, C122T; *sen1-*  
54 *2*, G332A) leading to amino acid substitutions (*sen1-1*, A41V; *sen1-2*, R111K) (Figure S1), as  
55 reported in previous studies (Kawaguchi et al., 2002; Hakoyama et al., 2012). *sen1-1* and *sen1-2*  
56 formed nodules upon inoculation with *Mesorhizobium loti* under N-free conditions. However, they  
57 displayed N-deficiency symptoms under symbiotic conditions (Figure 1A), including yellow  
58 leaves, a concomitant increase in the root to shoot ratio, and anthocyanin production in the stem.  
59 In *sen1* mutants these phenotypes have been attributed to a deficiency of N fixation (Suganuma et

60 *al.*, 2003). The nodules that formed on *sen1-1* and *sen1-2* were obviously smaller than those on  
61 the wild type (WT) *Gifu* (**Figure 1B**). Pink is a mark of nodule maturity because of the presence  
62 of abundant leghemoglobin, as occurred in the 78.5% of nodules on the WT; in contrast, the  
63 nodules formed on *sen1-1* and *sen1-2* were almost white, with only 5.4% and 10.6% of them,  
64 respectively, pink (**Figure 1C**).

65 Nodule number, total fresh weight and average weight of nodules per plant were quantified  
66 at 10 and 28 days post-inoculation (dpi), respectively. At 10 dpi inhibition of bacteroid  
67 differentiation has been observed in *sen1* mutants (Hakoyama *et al.*, 2012). At 28 dpi WT nodules  
68 generally reach maturity (Tobergte and Curtis, 2013). At 10 dpi no significant differences were  
69 observed in nodule number or total fresh weight or average weight of nodules per plant between  
70 the mutants and the WT (**Figure 1D–F**). At 28 dpi the nodule numbers in *sen1-1* and *sen1-2* were  
71 2.3 and 2.8 times higher than that in WT (both  $P < 0.001$ ), whereas the total nodule fresh weight  
72 and average nodule weight per plant were significantly lower in both mutants (both  $P < 0.001$ )  
73 (**Figure 1D–F**). These observations indicated that the *sen1* mutation resulted in plant growth  
74 defects under N fixation deficiency caused by altered nodulation in *L. japonicus*.

## 75 ***SEN1* mutation alters Mo allocation from the host plant fraction to bacteroids in nodules**

76 Bacteroids were separated from the host-plant fraction of the nodule cells. At 10 dpi, Mo  
77 accumulation in the whole nodules was comparable in the *sen1* mutants and the WT, irrespective  
78 of whether the Mo supply was sufficient or deficient (**Figure 2A and 2D**). However, at 10 dpi,  
79 with sufficient Mo supply ( $0.17 \mu\text{M Na}_2\text{MoO}_4$ ), the Mo concentration in the host plant fraction in  
80 *sen1-1* and *sen1-2* was significantly higher than that in the WT whereas in bacteroids it was  
81 significantly lower (both  $P < 0.001$ ) (**Figure 2B and 2C**). At 10 dpi, with deficient Mo supply,  
82 although the Mo concentration in the host plant fraction was comparable between the *sen1* mutants  
83 and the WT, in the bacteroids of *sen1-1* and *sen1-2* it was significantly lower than in the WT (both  
84  $P < 0.001$ ) (**Figure 2E and 2F**). At 28 dpi, a trend of significantly higher Mo accumulation in the  
85 nodules of the WT was observed in the whole nodules, in the host plant fraction, and in the  
86 bacteroids under either Mo sufficiency or deficiency (all  $P < 0.001$ ) (**Figure 2**). This can be  
87 ascribed to reduced Mo importation to the nodules because of the inhibition of nitrogenase activity  
88 in the *sen1* mutants (Suganuma *et al.*, 2003). Furthermore, we observed no significant differences  
89 in the Mo concentration in the roots or shoots between *sen1* mutants and the WT, regardless of the

90 growth duration or Mo supply (**Figure S2**). These results suggest that, at 10 dpi, the *SENI* mutation  
91 alters Mo allocation between the host plant host fraction and the bacteroids, possibly inhibiting  
92 Mo supply from the host plant to the bacteroids.

### 93 **Heterologous expression of *SENI* in *S. cerevisiae* shows Mo efflux transport activity**

94 *SENI* consists of only one exon without an intron, encoding a peptide with 227 amino acids.  
95 Domain prediction suggested that SEN1 is an integral membrane protein with five transmembrane  
96 regions (**Figure S1**). The altered molybdate allocation between the plant host fraction and the  
97 bacteroids in *sen1* mutants (**Figure 2**) suggested that *SENI* was involved in molybdate transport.  
98 Therefore, the *SENI* and *sen1-1* genes were introduced into *S. cerevisiae* (BY4741) by using the  
99 pYES2 expression vector, which allows the expression of the inserted gene under the control of  
100 the galactose-inducible *GALI* promoter. After being grown in SD (with glucose as a carbon source)  
101 or SG (with galactose as a carbon source) medium to the mid-log phase, the transformed yeast  
102 cells were transferred to SD or SG medium containing 170 nM molybdate for 30 min, after which  
103 the element concentrations in the cells were determined (**Figure 3**). When the yeast cells were  
104 grown with glucose, Mo accumulation in the cells was equally low among the different  
105 transformants. When the glucose in the medium was replaced with galactose, the Mo concentration  
106 in the yeast cells carrying *SENI* was 5.4 times lower than that in the cells carrying the empty vector  
107 and 5.1 times lower than that in the *sen1-1* cells (A41V) ( $P < 0.001$ ) (**Figure 3A**). In contrast, the  
108 yeast cells carrying *SENI*, after being grown in SG medium, accumulated contents of sulfur (S),  
109 Fe, Mn, copper (Cu), and zinc (Zn) similar to those in the yeast cells carrying empty vector (**Figure**  
110 **3B**). Fe, Mn, Cu, and Zn were analyzed because *SENI* is orthologous to *CCCI* and *VIT* ([Hakoyama  
111 et al., 2012](#)). S was analyzed because molybdate and sulfate are chemically similar and the first  
112 molybdate transporter in plants, MOT1, was originally annotated as a sulfate transporter (Sultr5;2)  
113 ([Tomatsu et al., 2007](#)). These results indicated that, despite its being orthologous to De or Mn  
114 transporters, SEN1 owns the capacity for Mo efflux transport, and the point mutation in *sen1-1*  
115 (A41V) resulted in the loss of Mo efflux activity.

### 116 ***sen1* mutants downregulate the expression of *nifD* and *nifK***

117 *nifD* and *nifK* encode the  $\alpha$ -subunit and  $\beta$ -subunit, respectively, of the heterotetrameric FeMo  
118 protein of nitrogenase. This protein is essential for the incorporation of Mo during nitrogenase

119 biosynthesis. Expression of *nifD* and *nifK* in the bacteroids of the *sen1* mutants and the WT was  
120 detected by quantitative RT-PCR analysis (**Figure 4**). The expression levels of *nifD* in the  
121 bacteroids of *sen1-1* and *sen1-2* were, 4.5 and 3.3 times lower than that of WT, respectively, and  
122 those of *nifK* were 3.5 and 2.7 times lower, respectively. These results indicated that mutation in  
123 *SEN1* had negative impacts on the assembly of FeMoco.

#### 124 **SEN1 is, in part, localized to the PBM of nodule cells**

125 A previous study has demonstrated that *SEN1* is expressed exclusively in the nodules  
126 ([Hakoyama et al., 2012](#)). We confirmed this by measuring the *SEN1* transcript abundance in  
127 different organs under different levels of Mo supply at 28 dpi by using quantitative RT-PCR (qRT-  
128 PCT) (**Figure 5A**). The results agreed well with those of the abovementioned study and showed  
129 that *SEN1* transcript was abundant in the nodules but almost undetectable in the other plant organs  
130 examined. Additionally, the expression level of *SEN1* was insensitive to variations in Mo  
131 concentration in the nutrient solution (**Figure 5A**). Moreover, we investigated the temporal  
132 dynamics of *SEN1* expression in the nodules (**Figure 5B**). Expression of *SEN1* was relatively low  
133 in young nodules (7 dpi). It then increased gradually, peaked at 28 dpi, and then steadily declined  
134 in older nodules. This may be attributable to reduced nutrient supply to nodules after 28 dpi  
135 because of inhibited nodule development. This result is consistent with a previous Northern blot  
136 analysis of temporal *SEN1* expression in the nodules ([Hakoyama et al., 2012](#)).

137 To elucidate the cellular and subcellular localization of *SEN1*, we used hairy root  
138 transformation to introduce an N-terminal-green fluorescent protein (GFP) fusion with the *SEN1*  
139 coding sequence, under the control of the native promoter of *SEN1*. *In situ* immunostaining of the  
140 *pSEN1:SEN1-GFP* product was conducted in transgenic nodules from hairy roots inoculated with  
141 red fluorescence protein (RFP)-expressing *M. loti* MAFF303099. The observed anti-GFP antibody  
142 signals targeted mainly those cells that were colonized by rhizobia (**Figure 5C–J**), implying that  
143 *SEN1* functions in rhizobium-infected cells. Furthermore, the anti-GFP signals from the infected  
144 cells overlapped well with the RFP signals from the rhizobia (**Figure 5F and 5J**), suggesting that  
145 *SEN1* was localized to the symbiosomes.

146 To further clarify the subcellular localization of *SEN1*, we performed immunolocalization of  
147 *SEN1* using immunoelectron microscopy. The antibody was obtained by immunizing rabbits with  
148 a synthetic peptide (positions 111 to 128 of the *SEN1* amino acid sequence). The specificity of the



149 antibody against SEN1 protein was confirmed by western blot using the total and the microsome  
150 fractions of nodules from the WT (**Figure S3**). A single band was observed for both fractions, and  
151 the size seemed to accord with the predicted SEN1 protein size (23,774 Da). With this antibody,  
152 SEN1 localization was further determined by using transmission electron microscopy and a  
153 colloidal-gold-conjugated secondary antibody (**Figure S4**). In the cross-sections of WT nodule  
154 samples obtained at 7, 14, and 21 dpi, the epitope was detected at the PBM, in bacteroids, and in  
155 the intracellular components of host nodule cells, including the cytosol and endomembrane  
156 compartments. The frequency of colloidal gold particles observed at the PBM in nodule samples  
157 was 35.6% at 7 dpi (n = 118), 42,1% at 14 dpi (n = 159), and 40.4% at 21 dpi (n = 75) (**Figure**  
158 **S5**). These results indicated that SEN1 was localized, in part, at the PBM of rhizobium-infected  
159 cells in nodules.

## 160 **Discussion**

161 Acquisition of N from the atmosphere by SNF is a sustainable alternative to the intensive use  
162 of synthetic N fertilizers in agriculture ([Henneron et al., 2020](#); [Herridge et al., 2022](#)). Mo supply  
163 is critical for SNF, as this micronutrient is essential for synthesis of the enzyme nitrogenase, which  
164 is directly involved in the reduction of N<sub>2</sub> to the phytoavailable N source, ammonium. However,  
165 in spite of the importance of Mo in SNF, the proteins mediating molybdate loading to symbionts  
166 remains to be discovered. Once in the cytosol of plant host cells, molybdate has to be pumped out  
167 and transported across the PBM to engage the bacteroids in nitrogenase synthesis. However, to our  
168 knowledge, no molybdate-specific efflux system is known. The only known plant-type specific  
169 molybdate transporters are all from the MOT family and show influx activity, including *MOT1*  
170 and *MOT2* in *Arabidopsis* ([Tomatsu et al., 2007](#); [Baxter et al., 2008](#); [Gasber et al., 2011](#)),  
171 *OsMOT1;1* and *OsMOT1;2* in rice ([Huang et al., 2019](#); [Ishikawa et al., 2021](#); [Hu et al., 2022](#)),  
172 *MtMOT1.2* and *MtMOT1.3* in *Medicago Truncatula* ([Tejada-Jiménez et al., 2017](#); [Gil-Díez et al.,](#)  
173 [2019](#)), and *LjMOT1* in *L. japonicus* ([Gao et al., 2016](#); [Duan et al., 2017](#)). Considering the renewed  
174 interest in introducing N<sub>2</sub>-fixing capacity into nonlegume cereals and the need for sustainable  
175 agriculture ([López-Torrejón et al., 2016](#); [Zhao et al., 2022](#)), this knowledge gap needs to be filled,  
176 with the aim of ensuring Mo delivery to produce functional nitrogenase in new biological systems.  
177 Our results are a decisive step towards the optimization of molybdate allocation for N<sub>2</sub> fixation.



178 Here, we have identified a nodule-specific molybdate efflux transporter, from a new family, as  
179 responsible for efficient Mo supply from the cytosol of host plant cells to bacteroids for SNF.

180 *sen1* belongs to the Fix<sup>-</sup> class of mutants, which form nodules filled with endosymbionts  
181 with dramatically reduced SNF activity, defects in bacteroid differentiation, and impaired nodule  
182 development (Kawaguchi et al., 2002; Sukanuma et al., 2003), implying that *SENI* is required for  
183 symbiosome maturation and SNF. These characteristics have also been discovered in the  
184 phenotype of *Gmvtl1* mutants (Brear et al., 2020; Liu et al., 2020). *GmVTL1a* in soybean is an  
185 ortholog of *SENI* but encodes a ferrous (Fe<sup>2+</sup>) transporter facilitating Fe<sup>2+</sup> import into the vacuole  
186 when expressed in yeast. However, yeast complementation assay results have shown that *SENI*  
187 cannot rescue the  $\Delta ccc1$  mutant yeast, although *GmVTL1a* could (Brear et al., 2020). Our findings  
188 demonstrated that the heterologous expression of *SENI* in yeast showed molybdate efflux capacity.  
189 Although Brear et al., (2020) provided indirect evidence for the potential role of *SENI* in Fe  
190 transport (rhizonium-infected cells in WT nodules showed stronger Perls/diaminobenzidine-  
191 staining than infected cells in *sen1-1* nodules), molybdate deficiency in symbionts may result in  
192 lower Fe accumulation, because Mo and Fe are both required by the bacteroids, and it is possible  
193 that their respective transporters are possibly co-expressed. *SENI* and *GmVTL1a* have 66% amino  
194 acid identity, whereas both of the protein structures of both remain unclear. Our previous study  
195 also demonstrated that the *SENI* mutation resulted in reduced Fe concentration in both the host  
196 plant fraction and the bacteroids (Hakoyama et al., 2012). This reduced Fe accumulation in the  
197 infected cells of *sen1* nodules may be attributed to a lower Fe requirement because Mo shortage  
198 inhibits nitrogenase biosynthesis, rather than to a loss of PBM-localized Fe transporter. The  
199 different functions of the orthologous genes *SENI* and *GmVTL1a* may be associated with the  
200 differences in the unknown domain (Figure S1). Further investigation of the protein structure is  
201 needed to elucidate the differences in function between *SENI* and *GmVTL1a*.

202 We found here that increasing the molybdate supply in the nutritive solution had a negligible  
203 impact on *SENI* expression in the nodules (Figure 5A) or on Mo accumulation in the bacteroids  
204 of *sen1* mutants (Figure 2). Additionally, Sukanuma et al., (2003) have reported that mutation of  
205 *SENI* completely abolishes SNF capacity. These results suggest that other genes are unable to  
206 complement the loss of *SENI* function in *sen1* mutants. This is different from the case with  
207 *MtMot1.2* and *MtMOT1.3*, two other nodule-specific Mo transporters that have been characterized  
208 (Tejada-Jiménez et al., 2017; Gil-Díez et al., 2019): 25% and 12% nitrogenase activity remained

209 in the *mot1-2* and *mot1-3* nodules, respectively, and the phenotype could be rescued by increasing  
210 the molybdate supply (Tejada-Jiménez et al., 2017; Gil-Díez et al., 2019). This implies that, at  
211 high molybdate concentration, other membrane transporters could counterbalance the absence of  
212 *MtMOT1.2* or *MtMOT1.3* activity. Although there are candidate genes, namely homologs of  
213 *LjMOT1* (Duan et al., 2017) or *SENI*, which are predicted to be expressed in a nodule-specific  
214 manner, seemingly none of them enables the compensation of *SENI* mutation. This implies that  
215 *SENI* is ultimately more important for SNF than it is for Mo nutrition, because it is involved in  
216 SNF and is expressed exclusively in nodules. Therefore, further studies are needed to investigate  
217 whether *SENI* is the sole transporter for the supply of molybdate into symbionts. Interestingly,  
218 phenotypes similar to those of *sen1* has been reported in the loss-of-function of *SST1* (PBM-  
219 localized symbiotic sulfate transporter in *L. japonicus*) (Krusell et al., 2005) and *GmVTL1a* (Brear  
220 et al., 2020; Liu et al., 2020). In theory, the reduced Fe supply resulting from *GmVTL1a* knockout  
221 can be complemented by the action of other known PBM-localized Fe exporters, including *DMT1*  
222 (*divalent metal transporter 1*) (Kaiser et al., 2003) and *FPN2* (*ferroportin2*) (Escudero et al., 2020).  
223 However, the complementation does not occur, even during growth under Fe sufficiency, and the  
224 *GmVTL1a* mutant has nodule defect identical to those in *sen1* (Liu et al., 2020).

225 *SENI* is expressed exclusively in the nodules (Figure 5A), in agreement with previous reports  
226 that genomic Southern hybridization does not detect DNA fragments homologous to *SENI* in non-  
227 legume plants (Hakoyama et al., 2012). *SENI* expression in the nodules increased continuously  
228 from 7 to 28 dpi (Figure 5B). This expression profile is consistent with a situation in which the  
229 rhizobia-infected cells are increasing their molybdate content to supply it to the bacteroids and  
230 thus satisfy the increasing demand for FeMoco synthesis as the nodule develops. After 28 dpi, the  
231 Mo requirement of the bacteroids might become lower, thus leading to a decline in *SENI*  
232 expression (Figure 5B).

233 *In situ* immunostaining has shown that the antibody signal from native promoter-driven  
234 SEN1-GFP is localized at symbiosomes. Although it was difficult to observe signals at the PBM  
235 due to limited resolution, we speculate that SEN1 is a PBM-localized protein, on the basis of the  
236 following evidence. First, the primary role of Mo in SNF is to be involved in the assembly of  
237 FeMoco for the synthesis of FeMo protein. *nifD* and *nifK* encode the  $\alpha$ -subunit and  $\beta$ -subunit of  
238 the heterotetrameric FeMo protein, respectively. The expression levels of *nifD* and *nifK* in the  
239 bacteroids of *sen1* mutants were much lower than that in WT plants (Figure 4), suggesting that

240 *SENI* may be pertinent to the synthesis of the FeMo protein (**Figure 4**). Secondly, the molybdate  
241 content of the isolated bacteroids of *sen1* mutants was significantly lower than that of WT plants  
242 (**Figure 2**), suggesting that *SENI* facilitates molybdate export from the cytosol of host plant cells  
243 into the symbiosomes. Finally, most components of the symbiosomes are derived from rhizobia,  
244 except for the PBM, which originates in the host plant. The overlapping signals between anti-GFP  
245 antibody and RFP-tagged rhizobium imply that the *L. japonicus* genome-encoded *SENI* probably  
246 targets the PBM. Additionally, our immunolocalization using anti-*SENI* antibody showed that the  
247 signals were observed not only at the PBM, but also in the bacteroids, as well as in the cytosol and  
248 endomembrane of host cells. The epitope detected in the intracellular compartment, especially the  
249 membrane compartments, could correspond to newly synthesized *SENI* protein being ferried  
250 towards the PBM. The epitope detected in the bacteroids might represent non-specific signals  
251 against bacteroid components, such as peptidoglycan, or the signals might be indicative of some  
252 unknown function of *SENI* associated with the bacteroids. Taken together, these findings indicate  
253 that *SENI* is, in part, localized at the PBM in rhizobium-infected cells.

254 Another interesting finding presented here was that the *sen1* mutation resulted in the  
255 formation of more nodules (**Figure 1D**), consistent with the findings of a previous study  
256 (Suganuma et al., 2003). A similar phenotype has been discovered in the mutants of PBM-localized  
257 Fe or sulfate transporters, including *DMT1* (Kaiser et al., 2003), *GmVTIL1a* (Brear et al., 2020;  
258 Liu et al., 2020), *MtVTL4* (Walton et al., 2020), and *SST1* (Krusell et al., 2005). Notably, Fe, S,  
259 and Mo are all required for the synthesis of nitrogenase (González-Guerrero et al., 2014).  
260 Considering that transporter genes are usually downstream targets in regulatory networks, *SENI*  
261 is unlikely to regulate autoregulation of a nodulation signaling pathway. One possible mechanism  
262 by which such pathways are regulated is by the feedback effect of inhibited SNF activity and  
263 nodule development, leading to the magnification of N-deficiency-responding signals and  
264 subsequently the stimulation of the generation of new nodules.

265 In this study, we demonstrated that *SENI* encodes a molybdate efflux transporter and is  
266 required to export molybdate from the cytosol of host plant cells to the bacteroids. We also found  
267 that *SENI* is exclusively expressed in the nodules of *L. japonicus* and is localized partly at the  
268 PBM. Because a steady supply of Mo is required for the synthesis of nitrogenase in the bacteroids  
269 of root nodules, *SENI* is indispensable for SNF. We elucidated why *sen1* mutants showed  
270 inhibition of nitrogenase activity and nodule development, as reported in previous studies

271 ([Suganuma et al., 2003](#); [Hakoyama et al., 2012](#)). We propose a model describing the potential role  
272 of *SENI* in molybdate transport for SNF in the nodule cells of *L. japonicus* (**Figure 6**). *SENI*  
273 localizes at the PBM to mediate molybdate efflux from the cytosol of host plant cells to the  
274 symbiosome. When the molybdate reaches the peribacteroid space, *ModABC* (encoding a  
275 molybdate transporter of the ATP-binding cassette protein) introduces the molybdate into the  
276 bacteroids. These molybdate is loaded for the assembly of FeMoco and further for the biosynthesis  
277 of nitrogenase. Our results fill the knowledge gap regarding how molybdate is allocated from the  
278 host plant to the bacteroids for SNF. This information is critical for developing new SNF biological  
279 systems in non-legume plants.

## 280 **Materials and methods**

### 281 **Plant materials and growth conditions**

282 Two mutant lines *sen1-1* (*Ljsum75*) and *sen1-2* (s88) were produced from ethylmethane  
283 sulfonate mutagenesis of ecotype *Gifu B-129*, as reported previously ([Kawaguchi et al., 2002](#)).  
284 The details of map-based cloning, segregation analysis of F2 progeny from crosses between mutant  
285 lines and the WT, and cDNA cloning of these mutant lines have been given in our previous study  
286 ([Hakoyama et al., 2012](#)). *sen1-1* and *sen1-2* both harbored single nucleotide mutations leading to  
287 amino acid substitutions (**Figure S1**).

288 Seeds of the parent *L. japonicus* ecotype *Gifu B-129* and the two mutant lines (*sen1-1*, *sen1-*  
289 *2*) were scarified with sandpaper, surface-sterilized with bleach, and then soaked in sterile water  
290 and shaken gently at room temperature for 24 h. Subsequently, the seeds were sown on agar (0.8%)  
291 plates containing half-strength B&D medium (Broughton and Dilworth, 1971) and left in the dark  
292 for 2 days. This was followed by cool-white light illumination ( $\sim 100 \mu\text{mol photons m}^{-2} \text{s}^{-1}$ , 16 h  
293 day/8 h night cycle) for 1 week. Nine days after germination the cotyledons were removed from  
294 the seedlings to limit Mo supply from cotyledons. The seedlings were then transplanted to a plastic  
295 pot filled with vermiculites, where they were watered with B&D solution ([Broughton and Dilworth,](#)  
296 [1971](#)) with deficient (17 nM) or sufficient (170 nM) Mo. When the plants were transplanted to the  
297 pots they were inoculated with the *Mesorhizobium loti* MAFF303099. Ten or 28 days after  
298 inoculation, the plants were harvested for nodule morphology observations and Mo concentration

299 determination. The plants were grown in a controlled chamber at 26 °C with 16 h day/8 h night  
300 cycle.

### 301 **Isolation of bacteroids from the nodule host fractions**

302 Bacteroids were isolated from nodules of the WT and the *sen1-1* and *sen1-2* mutants at 10 or  
303 28 dpi, in accordance with previous studies (Day et al., 1989; Hakoyama et al., 2012). Nodules  
304 were homogenized in 50 mM Tris–HCl (pH 7.5) and 0.15M NaCl, and then they were separated  
305 into a host plant fraction and a bacteroid fraction by centrifugation. The bacteroids and the nodule  
306 host fractions were rinsed three times by ultrapure water and then digested with concentrated  
307 HNO<sub>3</sub> and H<sub>2</sub>O<sub>2</sub>. Concentration of Mo was determined by inductively coupled plasma mass  
308 spectroscopy (ICP-MS) (Agilent 7800, Agilent Technologies, USA).

### 309 **Heterologous expression of *SENI* in *S. cerevisiae* and Mo transport activity assay**

310 The ORF of *SENI* or *sen1-1* was amplified by PCR using cDNA from the nodules and then  
311 cloned into the yeast expression vector pYES2 (Invitrogen, Carlsbad, CA), which allows  
312 expression of the inserted gene via the galactose-inducible *GALI* promoter. The *SENI*; pYES2  
313 vector and *sen1-1*; pYES2 were introduced into *S.cerevisiae* (BY4741, *MATa his3Δ1 leu2Δ0*  
314 *met15Δ0 ura3Δ0*) by using the lithium acetate transformation, respectively, and the empty vector  
315 pYES2 was used as a negative control. After transformation, the yeast cells were grown on plates  
316 with Mo-free selection (SD or SG) (Fred, 2002). To determine Mo uptake activity, yeast cells  
317 carrying *SENI*; pYES2, *sen1-1*; pYES2, or empty vector were cultured to the mid-log phase in  
318 Mo-free SD or SG medium and then incubated for 30 min at 30 °C in the same medium containing  
319 170 nM Na<sub>2</sub>MoO<sub>4</sub>. After Mo treatment, the yeast cells were harvested by centrifugation and  
320 washed twice in ice-cold ultrapure water. The yeast cells were then re-suspended in 2 mL ice-cold  
321 ultrapure water, with the OD<sub>600</sub> recorded, and were digested with concentrated HNO<sub>3</sub> and H<sub>2</sub>O<sub>2</sub>  
322 for ICP-MS analysis.

### 323 **RNA isolation and qRT-PCR**

324 To investigate the *SENI* expression levels in different tissues, seedlings were grown in pots  
325 containing half-strength B&D solution supplemented with 17 nM, 170 nM, or 1μM Mo. Nodules,  
326 roots, and shoots were harvested for RNA extraction 28 days after inoculation with *M. loti*

327 MAFF303099. To investigate the temporal variations in *SENI* expression in nodules, the nodules  
328 samples were harvested at 7, 14, 21, 28, 35, and 42 dpi from plants grown in the half-strength  
329 B&D solution supplemented with 170 nM Mo. The RNA extraction, cDNA synthesis, and qRT-  
330 PCR were done as described previously (Duan et al., 2017). The primers used for *SENI* and the  
331 internal standard (the *ubiquitin* gene) are shown in **Table S1**.

332 For the expression analysis of *nifD* and *nifK*, nodules were harvested from WT plants and the  
333 *sen1-1* and *sen1-2* mutants at 21 dpi, and bacteroids were prepared from each nodule by  
334 centrifugation as described in a previous study (Suganuma et al., 2003). Total RNA was isolated  
335 from the bacteroids. The cDNA was then synthesized by reverse-transcriptase (Superscript II,  
336 Invitrogen). The primers used for *NifD*, *NifK* and the internal standard (the *sigA* gene) (Ott et al.,  
337 2005), are shown in **Table S1**. Normalized relative expression was calculated by using the  $\Delta\Delta C_t$   
338 method.

### 339 **Immunohistological analysis**

340 The 2079 bp promoter along with the ORF of *SENI* (there is no intron in the *SENI* genomic  
341 sequence), excluding the stop codon, were amplified by using the primers in **Table S1**. The  
342 amplified PCR products were cloned into the *Bam*HI and *Eco*RI sites of pENTR2B vector  
343 (Invitrogen). The resulting sequence was subsequently subcloned into pMDC107 vector to create  
344 the *pSENI*; *SENI-GFP* constructs by using the Gateway LR reaction (Invitrogen). These  
345 constructs were transformed into *Agrobacterium rhizogenes* strain AR1193 for further hairy-root  
346 transformation according to the method described in a previous study (Hakoyama et al., 2012).  
347 Transgenic hairy roots were inoculated with DsRed-tagged *M. loti* 303099.

348 Immunostaining was performed according to the methods used by Sauer et al., (2006), with  
349 some modification. Briefly, 28-day-old nodules were fixed in 4% (w/v) paraformaldehyde  
350 buffered with microtubule-stabilizing buffer (MTSB) (pH 7.4). Then 0.1% Triton X-100 was  
351 added, and the mixture was kept overnight at 4 °C. After being washed twice with MTSB and two  
352 times with ultrapure water, the fixed samples were embedded in 5% agar in MTSB and sectioned  
353 (100- $\mu$ m) with a vibratome. Afterwards, the sections were placed on microscope slides and  
354 incubated with MTSB containing 0.1% (w/v) pectolyase Y-23 (Seishin) at 30 °C for 2 h. They  
355 were then reincubated in MTSB containing 0.3% (v/v) Triton X-100 at 30 °C for 2 h. Next, the  
356 sections were washed three times with MTSB and blocked with 5% (w/v) bovine serum albumin



357 in MTSB. After the blocking, the sections were treated with primary antibody solution (1: 100  
358 anti-GFP antibody (Thermo Fisher Scientific) in the blocking buffer) overnight at 37 °C and then  
359 washed three times. They were then treated with secondary antibody solution (1 : 200 of Alexa  
360 Fluor 488 goat anti-rabbit IgG; Molecular Probes, in the blocking buffer) for 2 hours at 37 °C and  
361 washed three times. The samples were mounted with 50% (v/v) glycerol in MTSB onto glass slides  
362 and observed by confocal laser microscopy (Olympus, FLUOVIEW FV3000). The respective  
363 excitation and emission wavelengths were 488 nm and 507-532 nm for the anti-GFP antibody, and  
364 561 nm and 600-650 nm for RFP-tagged rhizobia.

365 Furthermore, the synthetic peptide CRDMIKSEQGERDLEMAME (positions 111-128 of  
366 the SEN1 amino acid sequence) was used to immunize rabbits to obtain antibodies against *SEN1*.  
367 The antiserum was purified through a peptide affinity column. Antibody specificity was confirmed  
368 by western blot using the total and microsome proteins from 21-dpi nodules. Immunoelectron  
369 microscopy for immunolocalization of *SEN1* was conducted according to previous study ([Toyooka  
370 et al., 2009](#)). Briefly, nodules were collected at 7, 14, 21 dpi and were frozen in a high-pressure  
371 freezer (EM-ICE; Leica, Vienna, Austria) by using the fixation solution (0.25% (w/v)  
372 glutaraldehyde and 0.1% uranyl acetate (w/v) in acetone). The nodule samples were then replaced  
373 in methanol for 5 min each at 4 °C and in LR White hard-type resin at 3:1, 1:1 and 1:3 for 1 h each;  
374 they were then placed in 100% LR White resin twice for 1 h each. The samples were finally  
375 embedded in gelatin capsules in 100% LR White resin at -20 °C for 72 h under ultra-violet light.  
376 Ultra-sections were cut with a diamond knife (Ultra: Diatome, Nidau, Switzerland) and a Leica  
377 EM UC-7 ultramicrotome (Leica Microsystems, Vienna, Austria). The sections on nickel grids  
378 were blocked with a blocking buffer (Block Ace Powder; DS Pharma Biomedical Co., Ltd) for 30  
379 min. After being blocked, the sections were labeled with anti-SEN1 antibody (1: 20) for 5 h and  
380 anti-rabbit goat IgG antibody (1:20) conjugated with 12-nm colloidal gold particles diluted in  
381 blocking buffer. The sections were stained with 4% uranyl acetate (w/v) for 10 min and visualized  
382 under a transmission electron microscope (JEOL JEM-1400, Jeol, USA).

### 383 **Supplemental materials**

384 **Supplemental Figure 1.** Predicted tertiary structure model of SEN1 protein using AlphaFold v3  
385 and Schematic domain structure of the SEN1 protein and the point-mutation positions of the two  
386 *sen1* mutants.



387 **Supplemental Figure 2.** Mo concentration in the roots (A, C) and shoots (B, D) of WT and mutant  
388 lines grown under sufficient or deficient Mo supply.

389 **Supplemental Figure 3.** The specificity of antibody against SEN1 protein by western blot in the  
390 crude total protein and microsome protein of nodules from WT.

391 **Supplemental Figure 4.** Subcellular localization of SEN1 in the infected cells of nodules at 7 dpi,  
392 14 dpi and 21 dpi, respectively, using anti-SEN1 antibody.

393 **Supplemental Figure 5.** The frequency of colloidal gold particles observed in PBM, nodule host  
394 cells (intracellular components excluding symbiosome), and bacteroids in the cross-sections of  
395 nodule samples harvested from different dpi.

396 **Supplemental Table 1.** The primers used in this study.

397

### 398 **Acknowledgements**

399 This work was supported by the Grant-in-Aid for Scientific Research to T. F. (No. 20F20098,  
400 18H05490 and 19H05637), and by a Fellowship from the Japan Society for the Promotion of  
401 Science (JSPS) to Q. C. We thank Dr. Marcel Beier for the help during the experiment of western  
402 blot and immunostaining.

### 403 **Author contributions**

404 T.H., M.H. and T.F conceive the research plans; Q.C, T.H., M.H., and T.F. designed major aspects  
405 of the project; Q.C, T.H., K.T. and M.S. performed the experiments; Q.C, T.H., K.T. and M.S.  
406 analyzed the data; Q.C. and T.F. conceived the project and wrote the article with contributions of  
407 all the authors; T.F. supervised and finalized the manuscript. T.F. agrees to serve as the author  
408 responsible for contact and ensures communication.

409 **Figure legends**

410 **Figure 1.** Phenotypic analysis of *sen1-1* and *sen1-2* mutant plants after rhizobial inoculation.

411 (A) Growth of *Lotus japonicus* in the pots filled with vermiculites and watered with B&D medium

412 (Mo concentration: 170 nM). Scale bar = 2 cm.

413 (B) Nodule growth. Scale bar = 2 mm.

414 (C) Percentage of mature pink nodules in total nodules at 28 dpi. Scale bar = 1mm.

415 (D) Nodule number per plant.

416 (E) Nodule fresh weight per plant.

417 (F) Average nodule weight. Data are means  $\pm$  standard deviation (Student's *t* test, two-tailed  $P <$   
418  $0.05$  \*,  $P < 0.01$  \*\*,  $P < 0.001$  \*\*\*,  $n = 12$ ). dpi: days past inoculation.

419 **Figure 2.** Effects of *SENI* knockdown on Mo distribution in nodules of *Lotus japonicus* under  
420 sufficient (ABC) and deficient (DEF) Mo supply.

421 (AD) Mo concentration in the whole nodules;

422 (BE) Mo concentration in the plant host fraction;

423 (CF) Mo concentration in the bacteroids. Data are means  $\pm$  standard deviation of two independent  
424 experiments and each one contains 4 replicates. (Student's *t* test, two-tailed  $P < 0.05$  \*,  $P < 0.01$   
425 \*\*,  $P < 0.001$  \*\*\*). dpi: days past inoculation.

426 **Figure 3.** Mo transport activity of *SENI* in *Saccharomyces cerevisiae*.

427 (A) Mo uptake in yeast cells expressing *SENI* containing vector control (pYES2) or cloned from  
428 wild type (*Gifu*) or *sen1-1*. Yeast cells were incubated in selective media containing glucose (SD)  
429 or galactose (SG) supplemented with 170 nM  $\text{MoO}_4^{2-}$  for 30 min. Different letters indicate  
430 significant differences (Duncan's test,  $P < 0.001$ ,  $n = 3$  in each independent experiment for two  
431 times); small letters a-b; glucose; capital letters A-B: galactose.

432 (B) Sulfur (S), iron (Fe), manganese (Mn), copper (Cu), and zinc (Zn) concentration in the yeast  
433 cells expressing *SENI* or containing vector control (pYES2). Yeast cells were incubated in  
434 selective media containing galactose. Data are means  $\pm$  standard deviation.

435 **Figure 4.** Expression of *nifD* (A) and *nifK* (B) in nodules formed on the wild-type plant and the  
436 *sen1-1* and *sen1-2* mutants at 28 dpi. Expression was evaluated with qRT-PCR using *sigA* as an  
437 internal standard. Data are means  $\pm$  standard deviation (Duncan's test,  $P < 0.001$ ,  $n = 3$ ).

438 **Figure 5.** Tissue specificity of *SENI* expression and subcellular localization of SEN1 protein in  
439 *Lotus japonicus* nodules.

440 (a) Transcript level of *SENI* in tissue samples from roots, stems, leaves and nodules under different  
441 level of Mo supply at 28 dpi ( $n = 3$ ).

442 (b) Time-course transcript level of *SENI* during nodule development. Expression was evaluated  
443 by qRT-PCR using ubiquitin as an internal standard. Data are means  $\pm$  standard deviation ( $n = 3$ ).

444 (c–j): Immunofluorescence staining of *pSENI:SENI-GFP* transgenic nodules in hairy roots. The  
445 infected zone in (c–f) are magnified in (g–j). Hairy roots carrying *pSENI:SENI-GFP* were  
446 inoculated with a *M. Loti* strain carrying an RFP plasmid. 21-dpi nodule cross-sections were  
447 immunostained with a specific antibody against GFP. Green shows anti-GFP signals with  
448 excitation wavelength at 488 nm. Red shows RFP-tagged rhizobia with excitation wavelength of  
449 561 nm. Bars: (c–f) 200  $\mu\text{m}$ ; (g–j) 10  $\mu\text{m}$ .

450 **Figure 6.** Proposed model of the potential role of *SENI* in molybdate transport for nitrogen  
451 fixation in the nodule cells of *Lotus japonicus*. *SENI* localizes on the peribacteroid membrane to  
452 mediate molybdate efflux from cytoplasm of plant host cells to the symbiosome. Upon reaching  
453 the peribacteroid space, *ModABC* operon would introduce molybdate into the bacteroid. These  
454 molybdate could be loaded to the assembly of Fe-Mo cofactor and further for biosynthesis of  
455 nitrogenase. PM: plasma membrane; PBM: peribacteroid membrane

## References

- Baxter I, Muthukumar B, Hyeong CP, Buchner P, Lahner B, Danku J, Zhao K, Lee J, Hawkesford MJ, Guerinot M Lou, et al** (2008) Variation in molybdenum content across broadly distributed populations of *Arabidopsis thaliana* is controlled by a mitochondrial molybdenum transporter (MOT1). *PLoS Genet.* doi: 10.1371/journal.pgen.1000004
- Brear EM, Bedon F, Gavrin A, Kryvoruchko IS, Udvardi MK, Day DA, Smith PMC** (2020) GmVTL1a is an iron transporter on the symbiosome membrane of soybean with an important role in nitrogen fixation. *New Phytol* 228: 667–681
- Broughten WJ, Dilworth MJ** (1971) Control of leghaemoglobin synthesis in snake beans. *Biochem J* 125: 1075-1080
- Day D, Price G, Udvardi M** (1989) Membrane Interface of the *Bradyrhizobium japonicum* - *Glycine max* Symbiosis: Peribacteroid Units From Soyabean Nodules. *Funct Plant Biol* 16: 69
- Duan G, Hakoyama T, Kamiya T, Miwa H, Lombardo F, Sato S, Tabata S, Chen Z, Watanabe T, Shinano T, et al** (2017) LjMOT1, a high-affinity molybdate transporter from *Lotus japonicus*, is essential for molybdate uptake, but not for the delivery to nodules. *Plant J* 90: 1108–1119
- Escudero V, Abreu I, Tejada-Jiménez M, Rosa-Núñez E, Quintana J, Prieto RI, Larue C, Wen J, Villanova J, Mysore KS, et al** (2020) *Medicago truncatula* Ferroportin2 mediates iron import into nodule symbiosomes. *New Phytol* 228: 194–209
- Fred S** (2002) Getting started with yeast. *Methods Enzymol* 350: 3–41
- Gao JS, Wu FF, Shen ZL, Meng Y, Cai YP, Lin Y** (2016) A putative molybdate transporter LjMOT1 is required for molybdenum transport in *Lotus japonicus*. *Physiol Plant.* doi: 10.1111/ppl.12489
- Gasber A, Klaumann S, Trentmann O, Tramczynska A, Clemens S, Schneider S, Sauer N, Feifer I, Bittner F, Mendel RR, et al** (2011) Identification of an *Arabidopsis* solute carrier critical for intracellular transport and inter-organ allocation of molybdate. *Plant Biol* 13: 710–718
- Gil-Díez P, Tejada-Jiménez M, León-Mediavilla J, Wen J, Mysore KS, Imperial J, González-Guerrero M** (2019) MtMOT1.2 is responsible for molybdate supply to *Medicago truncatula* nodules. *Plant Cell Environ* 42: 310–320

- González-Guerrero M, Matthiadis A, Sáez Á, Long TA** (2014) Fixating on metals: New insights into the role of metals in nodulation and symbiotic nitrogen fixation. *Front Plant Sci.* doi: 10.3389/fpls.2014.00045
- Hakoyama T, Niimi K, Yamamoto T, Isobe S, Sato S, Nakamura Y, Tabata S, Kumagai H, Umehara Y, Brossuleit K, et al** (2012) The integral membrane protein SEN1 is required for symbiotic nitrogen fixation in lotus japonicus nodules. *Plant Cell Physiol* **53**: 225–236
- Henneron L, Kardol P, Wardle DA, Cros C, Fontaine S** (2020) Rhizosphere control of soil nitrogen cycling: a key component of plant economic strategies. *New Phytol* **228**: 1269–1282
- Hernandez JA, George SJ, Rubio LM** (2009) Molybdenum trafficking for nitrogen fixation. *Biochemistry* **48**: 9711–9721
- Herridge DF, Giller KE, Jensen ES, Peoples MB** (2022) Quantifying country-to-global scale nitrogen fixation for grain legumes II. Coefficients, templates and estimates for soybean, groundnut and pulses. *Plant Soil* 1–15
- Hille R, Nishino T, Bittner F** (2011) Molybdenum enzymes in higher organisms. *Coord Chem Rev* **255**: 1179–1205
- Hu D, Li M, Zhao FJ, Huang XY** (2022) The Vacuolar Molybdate Transporter OsMOT1;2 Controls Molybdenum Remobilization in Rice. *Front Plant Sci* **13**: 1–13
- Huang XY, Liu H, Zhu YF, Pinson SRM, Lin HX, Guerinot M Lou, Zhao FJ, Salt DE** (2019) Natural variation in a molybdate transporter controls grain molybdenum concentration in rice. *New Phytol* **221**: 1983–1997
- Ishikawa S, Hayashi S, Tanikawa H, Iino M, Abe T, Kuramata M, Feng Z, Fujiwara T, Kamiya T** (2021) Tonoplast-Localized OsMOT1;2 Participates in Interorgan Molybdate Distribution in Rice. *Plant Cell Physiol* **62**: 913–921
- Kaiser BN, Moreau S, Castelli J, Thomson R, Lambert A, Bogliolo S, Puppo A, Day DA** (2003) The soybean NRAMP homologue, GmDMT1, is a symbiotic divalent metal transporter capable of ferrous iron transport. *Plant J* **35**: 295–304
- Kawaguchi M, Imaizumi-Anraku H, Koiwa H, Niwa S, Ikuta A, Syono K, Akao S** (2002) Root, root hair, and symbiotic mutants of the model legume *Lotus japonicus*. *Mol Plant-Microbe Interact* **15**: 17–26

- Krusell L, Krause K, Ott T, Desbrosses G, Krämer U, Sato S, Nakamura Y, Tabata S, James EK, Sandal N, et al** (2005) The sulfate transporter SST1 is crucial for symbiotic nitrogen fixation in *Lotus japonicus* root nodules. *Plant Cell* **17**: 1625–1636
- Liu S, Liao LL, Nie MM, Peng WT, Zhang MS, Lei JN, Zhong YJ, Liao H, Chen ZC** (2020) A VIT-like transporter facilitates iron transport into nodule symbiosomes for nitrogen fixation in soybean. *New Phytol* **1413–1428**
- López-Torrejón G, Jiménez-Vicente E, Buesa JM, Hernandez JA, Verma HK, Rubio LM** (2016) Expression of a functional oxygen-labile nitrogenase component in the mitochondrial matrix of aerobically grown yeast. *Nat Commun* **7**: 1–6
- Milton RD** (2022) Nitrogenase loosens its belt to fix dinitrogen. *Nat Catal* **5**: 361–362
- Ohki Y, Munakata K, Matsuoka Y, Hara R, Kachi M, Uchida K, Tada M, Cramer RE, Sameera WMC, Takayama T, et al** (2022) Nitrogen reduction by the Fe sites of synthetic [Mo<sub>3</sub>S<sub>4</sub>Fe] cubes. *607*: 6–11
- Ott T, Van Dongen JT, Günther C, Krusell L, Desbrosses G, Vigeolas H, Bock V, Czechowski T, Geigenberger P, Udvardi MK** (2005) Symbiotic Leghemoglobins Are Crucial for Nitrogen Fixation in Legume Root Nodules but Not for General Plant Growth and Development. *Curr Biol* **15**: 531–535
- Sauer M, Paciorek T, Benková E, Friml J** (2006) Immunocytochemical techniques for whole-mount in situ protein localization in plants. *Nat Protoc* **1**: 98–103
- Suganuma N, Nakamura Y, Yamamoto M, Ohta T, Koiwa H, Akao S, Kawaguchi M** (2003) The *Lotus japonicus* Sen1 gene controls rhizobial differentiation into nitrogen-fixing bacteroids in nodules. *Mol Genet Genomics* **269**: 312–320
- Tejada-Jiménez M, Gil-Díez P, León-Mediavilla J, Wen J, Mysore KS, Imperial J, González-Guerrero M** (2017) *Medicago truncatula* Molybdate Transporter type 1 (MtMOT1.3) is a plasma membrane molybdenum transporter required for nitrogenase activity in root nodules under molybdenum deficiency. *New Phytol* **216**: 1223–1235
- Tobergte DR, Curtis S** (2013) *Lotus japonicus* Handbook.
- Tomatsu H, Takano J, Takahashi H, Watanabe-Takahashi A, Shibagaki N, Fujiwara T** (2007) An *Arabidopsis thaliana* high-affinity molybdate transporter required for efficient uptake of molybdate from soil. *Proc Natl Acad Sci U S A* **104**: 18807–18812

**Toyooka K, Goto Y, Asatsuma S, Koizumi M, Mitsui T, Matsuoka K** (2009) A mobile secretory vesicle cluster involved in mass transport from the golgi to the plant cell exterior. *Plant Cell* **21**: 1212–1229

**Udvardi M, Poole PS** (2013) Transport and metabolism in legume-rhizobia symbioses. *Annu Rev Plant Biol* **64**: 781–805

**Walton JH, Kontra-Kováts G, Green RT, Domonkos Á, Horváth B, Brear EM, Franceschetti M, Kaló P, Balk J** (2020) The *Medicago truncatula* Vacuolar iron Transporter-Like proteins VTL4 and VTL8 deliver iron to symbiotic bacteria at different stages of the infection process. *New Phytol* **228**: 651–666

**White J, Prell J, James EK, Poole P** (2007) Nutrient sharing between symbionts. *Plant Physiol* **144**: 604–614

**Zhao J, Chen J, Beillouin D, Lambers H, Yang Y, Smith P, Zeng Z, Olesen JE, Zang H** (2022) Global systematic review with meta-analysis reveals yield advantage of legume-based rotations and its drivers. *Nat Commun* **13**: 4926



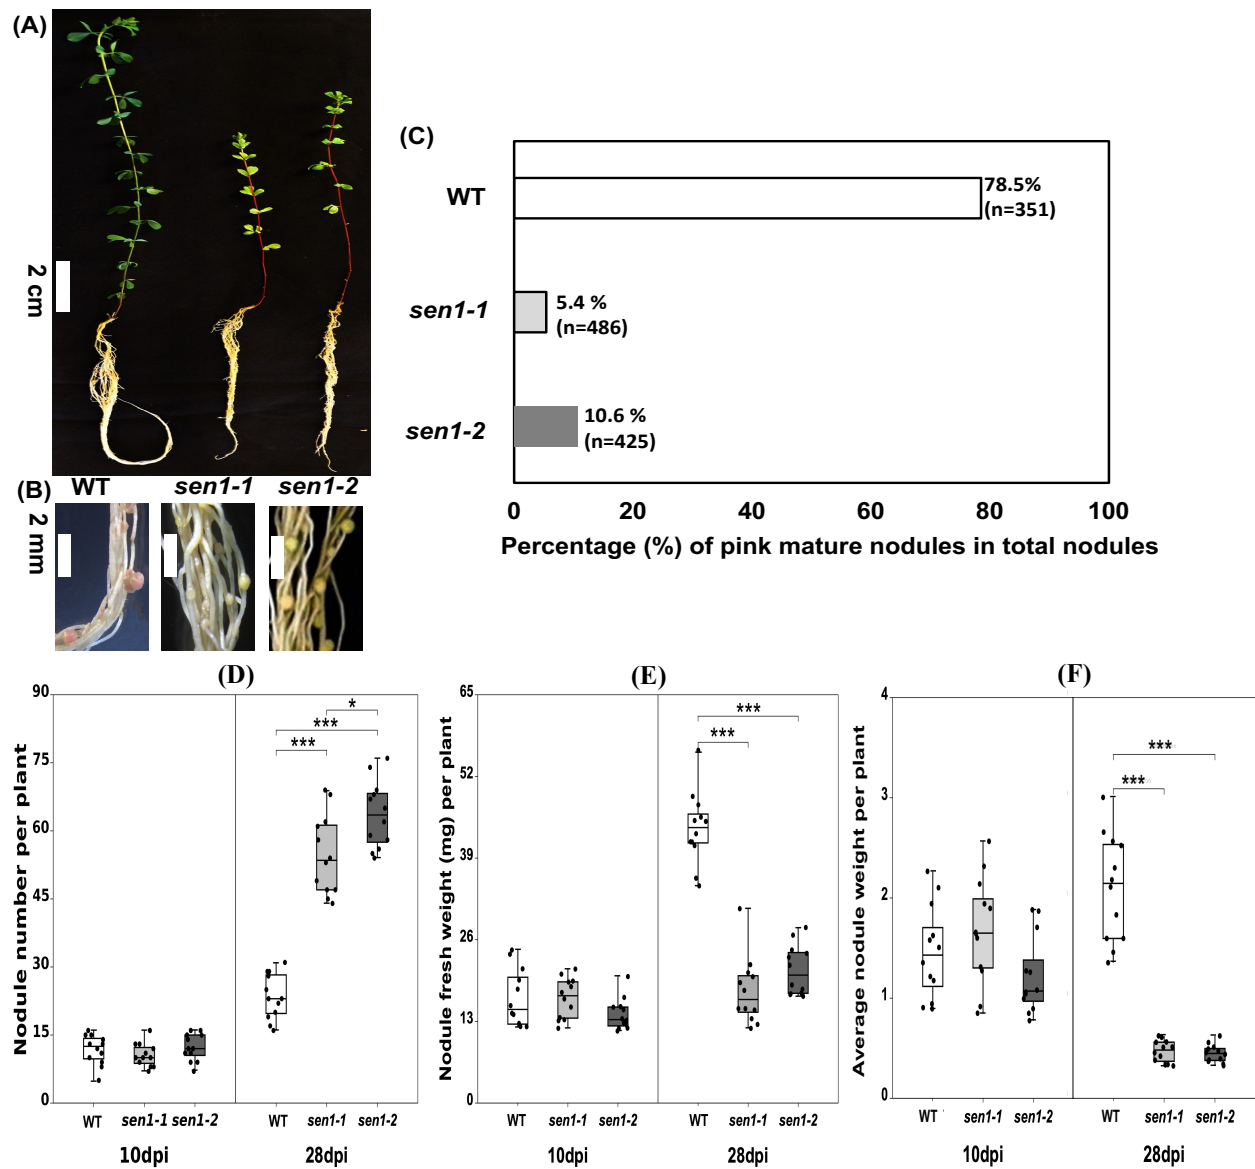

**Figure 1.** Phenotypic analysis of *sen1-1* and *sen1-2* mutant plants after rhizobial inoculation.

(A) Growth of *Lotus japonicus* in the pots filled with vermiculites and watered with B&D medium (Mo concentration: 170 nM). Scale bar = 2 cm.

(B) Nodule growth. Scale bar = 2 mm.

(C) Percentage of mature pink nodules in total nodules at 28 dpi. Scale bar = 1 mm.

(D) Nodule number per plant.

(E) Nodule fresh weight per plant.

(F) Average nodule weight. Data are means  $\pm$  standard deviation (Student's *t* test, two-tailed  $P < 0.05$  \*,  $P < 0.01$  \*\*,  $P < 0.001$  \*\*\*,  $n = 12$ ). dpi: days past inoculation.

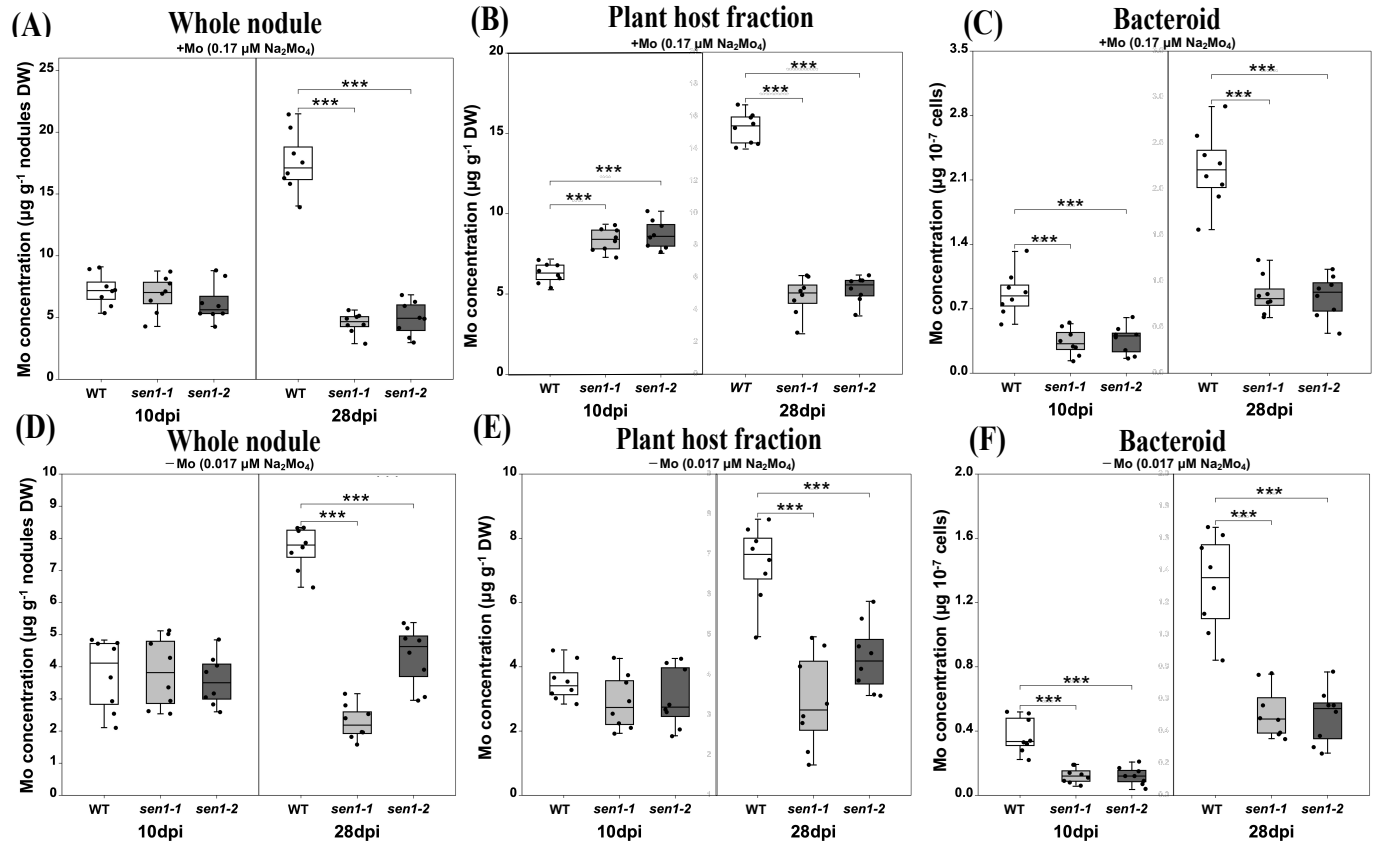

**Figure 2.** Effects of *SENI* knockdown on Mo distribution in nodules of *Lotus japonicus* under sufficient (ABC) and deficient (DEF) Mo supply.

(AD) Mo concentration in the whole nodules;

(BE) Mo concentration in the plant host fraction;

(CF) Mo concentration in the bacteroids. Data are means  $\pm$  standard deviation of two independent experiments and each one contains 4 replicates. (Student's *t* test, two-tailed  $P < 0.05$  \*,  $P < 0.01$  \*\*,  $P < 0.001$  \*\*\*). dpi: days past inoculation.

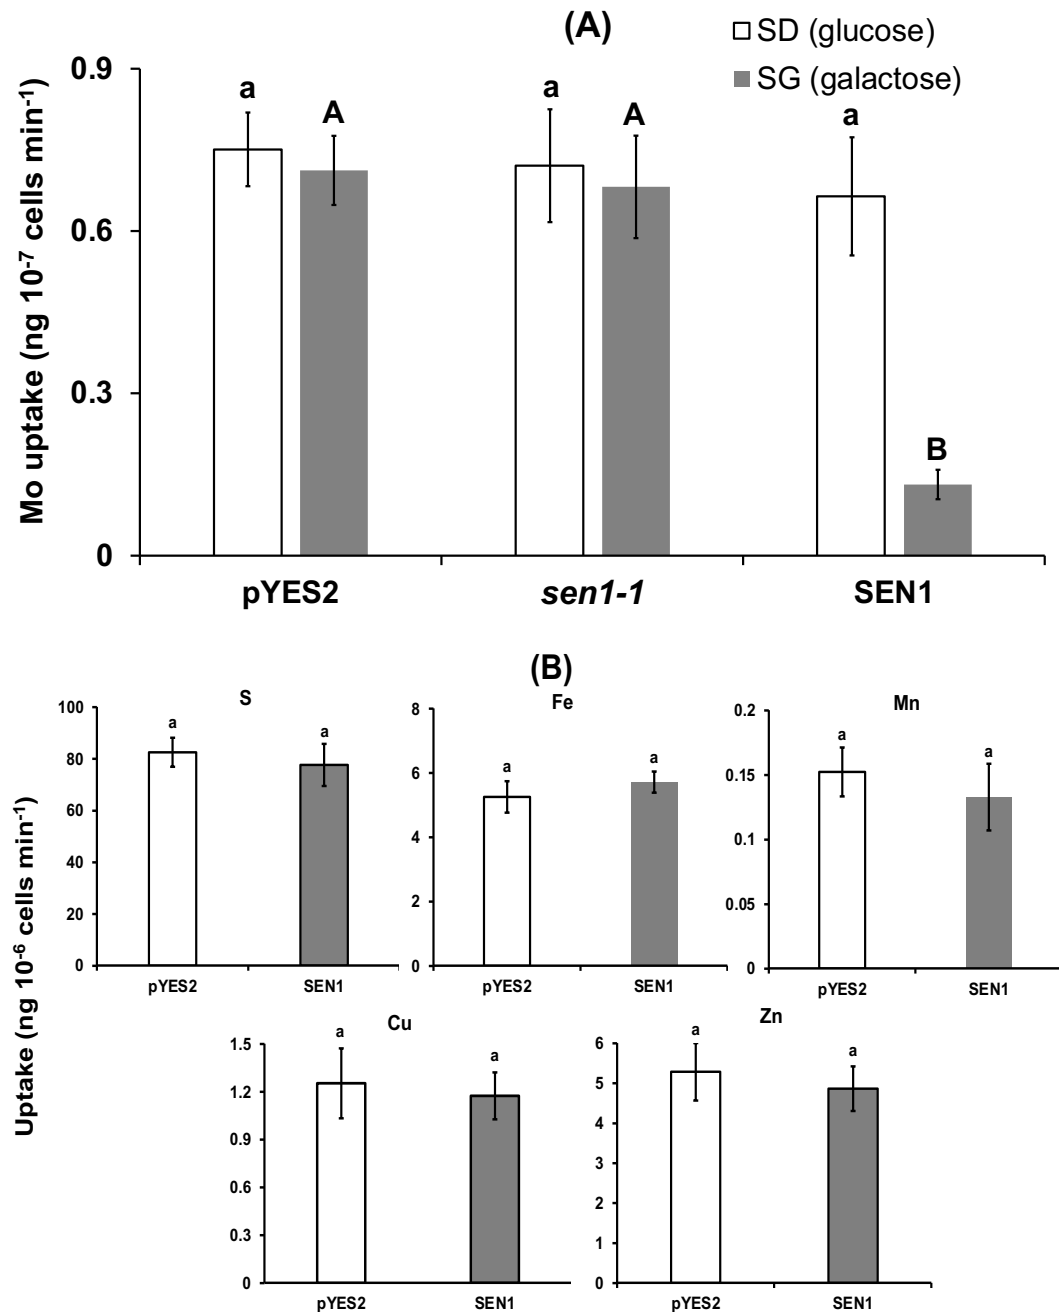

**Figure 3.** Mo transport activity of *SEN1* in *Saccharomyces cerevisiae*.

(A) Mo uptake in yeast cells expressing *SEN1* containing vector control (pYES2) or cloned from wild type (*Gifu*) or *sen1-1*. Yeast cells were incubated in selective media containing glucose (SD) or galactose (SG) supplemented with 170 nM  $\text{MoO}_4^{2-}$  for 30 min. Different letters indicate significant differences (Duncan's test,  $P < 0.001$ ,  $n = 3$  in each independent experiment for two times); small letters a-b; glucose; capital letters A-B: galactose.

(B) Sulfur (S), iron (Fe), manganese (Mn), copper (Cu), and zinc (Zn) concentration in the yeast cells expressing *SEN1* or containing vector control (pYES2). Yeast cells were incubated in selective media containing galactose. Data are means  $\pm$  standard deviation.

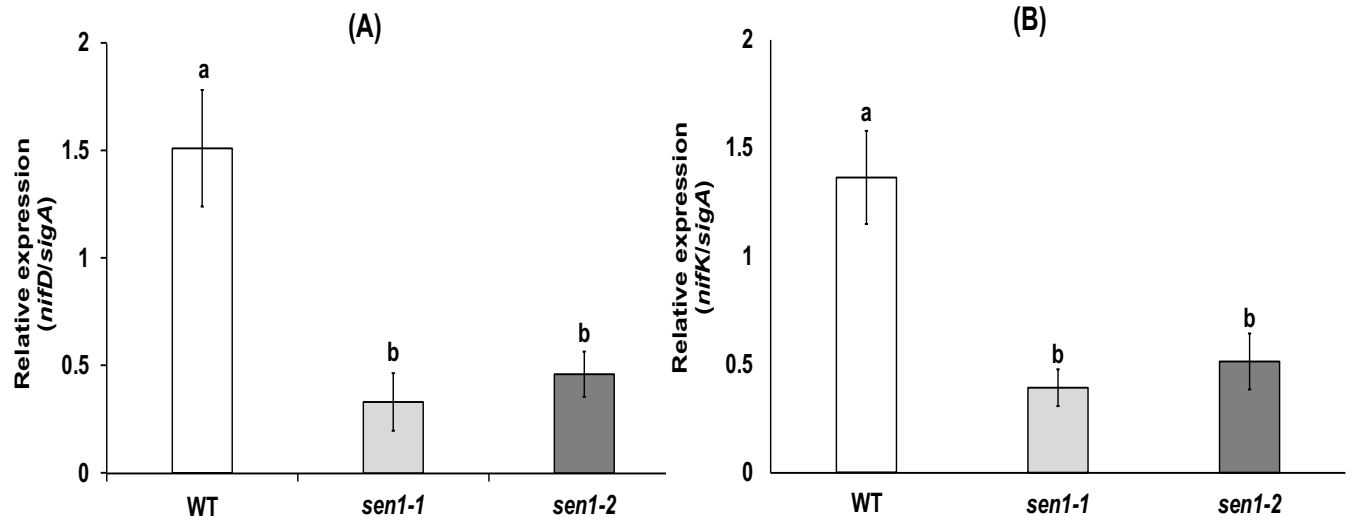

**Figure 4.** Expression of *nifD* (A) and *nifK* (B) in nodules formed on the wild-type plant and the *sen1-1* and *sen1-2* mutants at 28 dpi. Expression was evaluated with qRT-PCR using *sigA* as an internal standard. Data are means  $\pm$  standard deviation (Duncan's test,  $P < 0.001$ ,  $n = 3$ ).

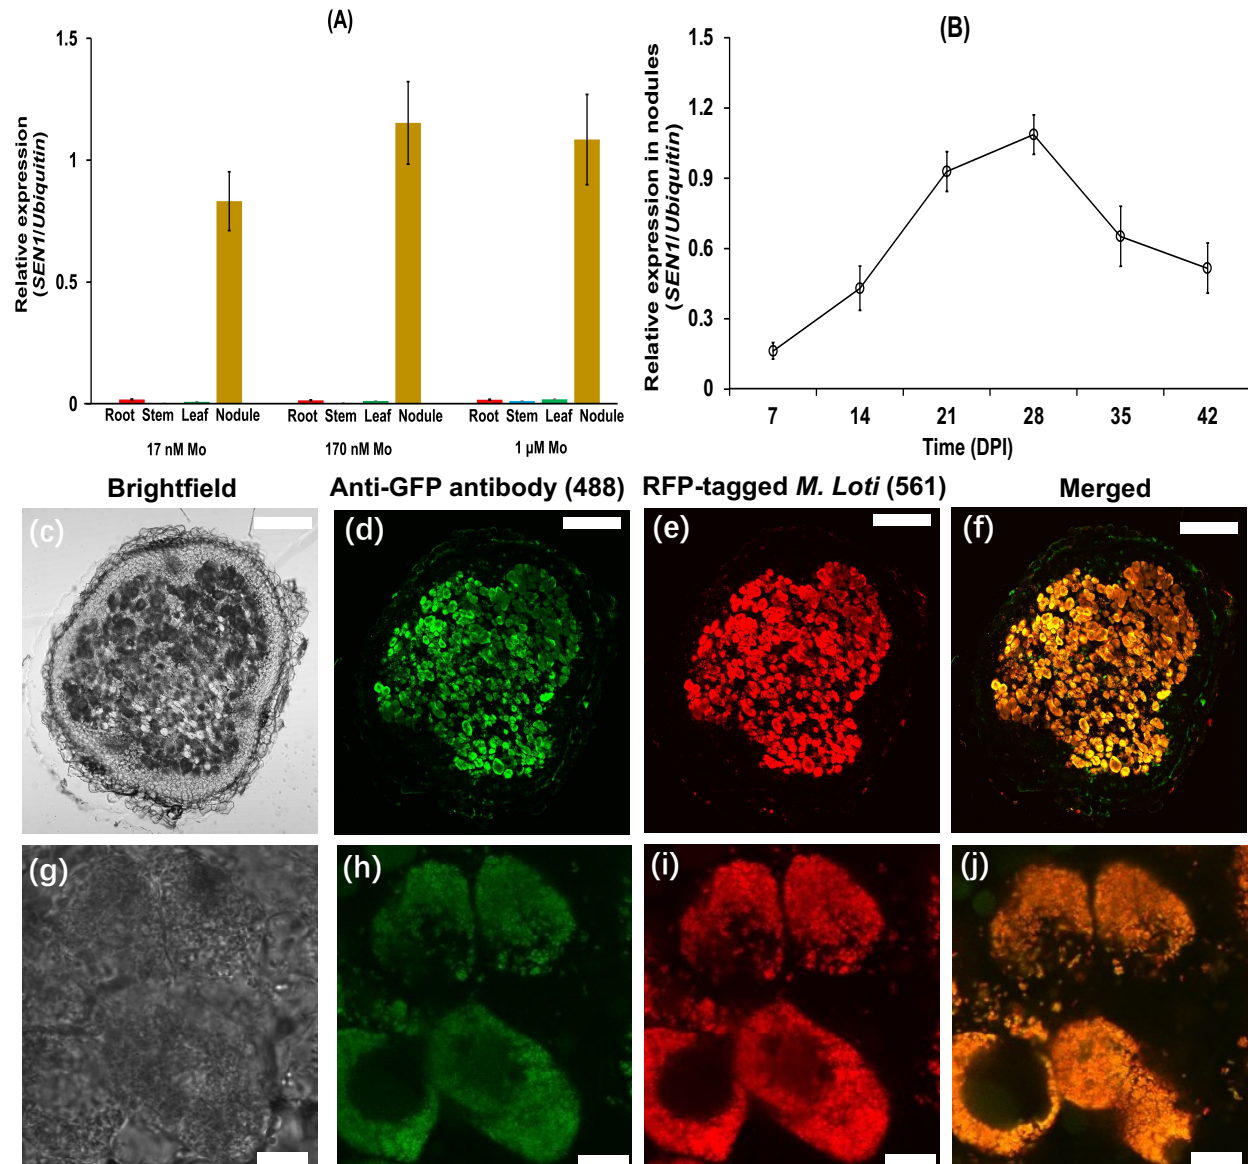

**Figure 5.** Tissue specificity of *SEN1* expression and subcellular localization of SEN1 protein in *Lotus japonicus* nodules.

(a) Transcript level of *SEN1* in tissue samples from roots, stems, leaves and nodules under different level of Mo supply at 28 dpi (n = 3).

(b) Time-course transcript level of *SEN1* during nodule development. Expression was evaluated by qRT-PCR using ubiquitin as an internal standard. Data are means ± standard deviation (n = 3).

(c–j): Immunofluorescence staining of *pSEN1:SEN1-GFP* transgenic nodules in hairy roots. The infected zone in (c–f) are magnified in (g–j). Hairy roots carrying *pSEN1:SEN1-GFP* were inoculated with a *M. Loti* strain carrying an RFP plasmid. 21-dpi nodule cross-sections were immunostained with a specific antibody against GFP. Green shows anti-GFP signals with excitation wavelength at 488 nm. Red shows RFP-tagged rhizobia with excitation wavelength of 561 nm. Bars: (c-f) 200 μm; (g-j) 10 μm.

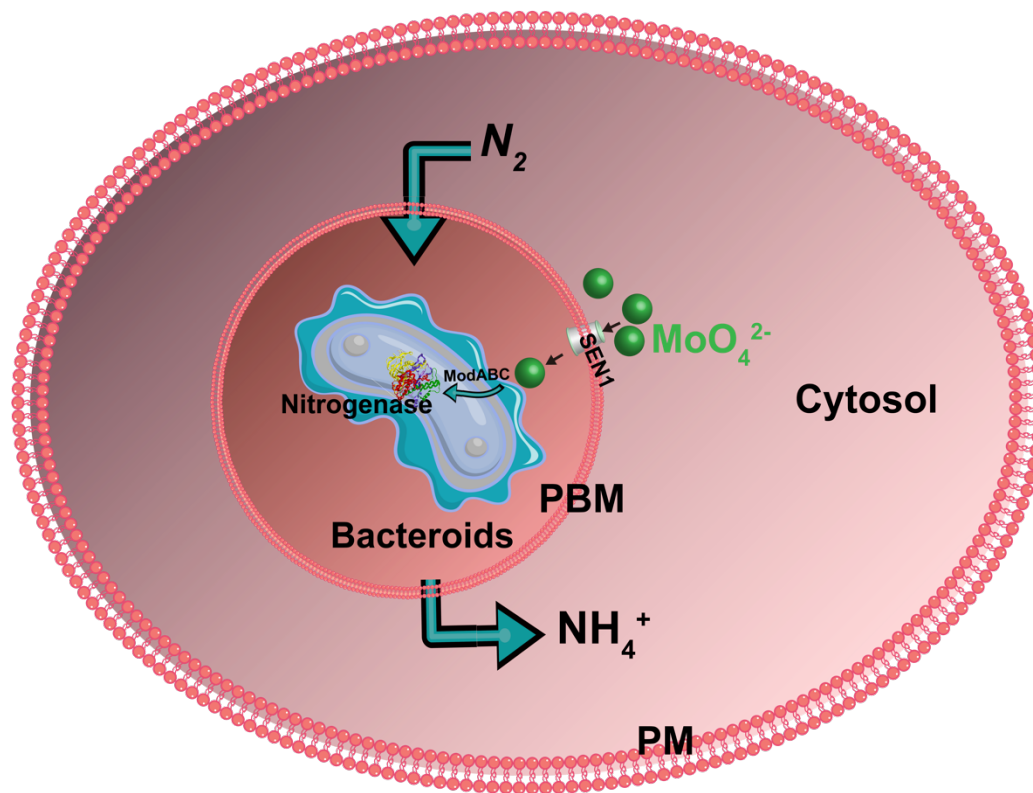

**Figure 6.** Proposed model of the potential role of *SENI* in molybdate transport for nitrogen fixation in the nodule cells of *Lotus japonicus*. *SENI* localizes on the peribacteroid membrane to mediate molybdate efflux from cytoplasm of plant host cells to the symbiosome. Upon reaching the peribacteroid space, *ModABC* operon would introduce molybdate into the bacteroid. These molybdate could be loaded to the assembly of Fe-Mo cofactor and further for biosynthesis of nitrogenase. PM: plasma membrane; PBM: peribacteroid membrane
